# Supplementary material for: Infrared: a declarative tree decomposition-powered framework for bioinformatics
Source: Research Square preprint supplement (doi:10.21203/rs.3.rs-3366298/v1), 2023-09-27
Supplement: Supplementary file [file f326c0df0b6cd1cecb26a522.pdf]

# Infrared: a declarative tree decomposition-powered framework for bioinformatics

## Additional file 1

Hua-Ting Yao, Bertrand Marchand, Sarah J. Berkemer, Yann Ponty, Sebastian Will

Recall the following few definitions and notation from the main text. Given the cluster tree  $(T, \chi, \phi)$  and a node  $u$  of  $T$ . If  $u$  has the parent  $v$ , then  $\text{diff}(u) = \chi(u) \setminus \chi(v)$  and  $\text{sep}(u) = \chi(v) \cap \chi(u)$ ; otherwise, if  $u$  is the root,  $\text{diff}(u) = \chi(u)$  and  $\text{sep}(u) = \emptyset$ . Moreover, we defined  $T_u$  as the subtree under node  $u$ ,  $\chi(T_u) = \bigcup_{u' \in T_u} \chi(u')$  and  $\text{diff}(T_u) = \chi(T_u) \setminus \text{sep}(u)$ . We use the following lemma.

**Lemma S1.**  $\{\text{diff}(T_c) \mid c \text{ child of } u\}$  is a partition of  $\chi(T_u) \setminus \chi(u) = \text{diff}(T_u) \setminus \text{diff}(u)$ .

*Proof.* Let  $u$  be a node of the cluster tree  $(T, \chi, \phi)$ ,  $c$  and  $c'$  be children of  $u$ , then  $\text{diff}(T_c) \cap \text{diff}(T_{c'}) = \emptyset$ , since—due to tree decomposition property (3)—any common element must be in  $\chi(u)$  in contradiction to the definition of  $\text{diff}$  on subtrees; moreover,

$$\begin{aligned} \bigcup \{\text{diff}(T_c) \mid c \text{ child of } u\} &= \bigcup_{c \text{ child of } u} \chi(c) \setminus \text{sep}(c) \\ &= \bigcup_{c \text{ child of } u} \chi(c) \setminus \bigcup_{c \text{ child of } u} \text{sep}(c) \\ &= \bigcup_{c \text{ child of } u} \chi(c) \setminus \chi(u) = \text{diff}(T_u) \setminus \text{diff}(u). \end{aligned}$$

□

## 1 Correctness of optimization

*Proof of Proposition 1.* We are going to show the correctness by structural induction on the cluster tree. For the base case, let  $u$  be a leaf of the cluster tree. Since the subtree  $T_u$  is the node  $u$  itself, Eq. 3 for a leaf  $u$  is written as

$$m_{u \rightarrow v}(\bar{x}) = \max_{\substack{\bar{x}' \in \mathcal{A}_{\text{diff}(u)} \\ \bar{x} \cup \bar{x}' \text{ is valid}}} \sum_{f \in \phi(u)} \alpha_f f(\bar{x} \cup \bar{x}').$$

Thus, Proposition 1 holds for leaves  $u$ , since they do not have children.

For the induction step, let  $u$  be an internal node of the cluster tree and assume Proposition 1 holds for all children of  $u$ . Denote the children of  $u$  as  $c_1 \dots, c_k$ . We directly apply the induction hypothesis to the r.h.s of the claim.

$$\text{r.h.s. (4)} = \max_{\substack{\bar{x}' \in \mathcal{A}_{\text{diff}(u)} \\ \bar{x} \cup \bar{x}' \text{ is valid}}} \left[ \sum_{f \in \phi(u)} \alpha_f f(\bar{x} \cup \bar{x}') + \sum_{c_i \text{ child of } u} \max_{\substack{\bar{y}_i \in \mathcal{A}_{\text{diff}(T_{c_i})} \\ \bar{x} \cup \bar{x}' \cup \bar{y}_i \text{ is valid}}} \sum_{f \in \phi(T_{c_i})} \alpha_f f(\bar{x} \cup \bar{x}' \cup \bar{y}_i) \right]$$

Our goal is to show equivalence to the r.h.s. of Eq. (3). By Lemma S1 set  $\text{diff}(T_u) \setminus \text{diff}(u)$  is disjointly decomposed into  $\text{diff}(T_{c_1}) \dots \text{diff}(T_{c_k})$ ; moreover,  $\phi(T_u) \setminus \phi(u)$  is partitioned into  $\phi(T_{c_i})$ ,  $i = 1 \dots k$ . It follows that for every fixed assignment  $\bar{x} \cup \bar{x}'$ , the maximizations over  $\bar{y}_i \in \text{diff}(T_{c_i})$  are independent for different  $i$ ; as well the sum over the functions of bag  $u$  is independent of the maximizations. Thus, we can move the maximizations over the assignments  $\bar{y}_i$  in front of the summations.

$$= \max_{\substack{\bar{x}' \in \mathcal{A}_{\text{diff}(u)} \\ \bar{x} \cup \bar{x}' \text{ is valid}}} \max_{\substack{\bar{y}_1 \in \mathcal{A}_{\text{diff}(T_{c_1})} \\ \bar{x} \cup \bar{x}' \cup \bar{y}_1 \text{ is valid}}} \dots \max_{\substack{\bar{y}_k \in \mathcal{A}_{\text{diff}(T_{c_k})} \\ \bar{x} \cup \bar{x}' \cup \bar{y}_k \text{ is valid}}} \left[ \sum_{f \in \phi(u)} \alpha_f f(\bar{x} \cup \bar{x}') + \sum_{c_i \text{ child of } u} \sum_{f \in \phi(T_{c_i})} \alpha_f f(\bar{x} \cup \bar{x}' \cup \bar{y}_i) \right]$$

Then, we combine the maximizations over the single partial assignments  $\bar{y}_i$ ; moreover we replace the sums with a single sum ranging over the combined assignments  $\bar{y}$  of  $\text{diff}(T_u) \setminus \text{diff}(u)$ .

$$= \max_{\substack{\bar{x}' \in \mathcal{A}_{\text{diff}(u)} \\ \bar{x} \cup \bar{x}' \cup \bar{y} \text{ is valid}}} \max_{\substack{\bar{y} \in \mathcal{A}_{\text{diff}(T_u) \setminus \text{diff}(u)} \\ \bar{x} \cup \bar{x}' \cup \bar{y} \text{ is valid}}} \left[ \sum_{f \in \phi(T_u)} \alpha_f f(\bar{x} \cup \bar{x}' \cup \bar{y}) \right]$$

The last term equals r.h.s. of Eq. (3), showing the induction step.  $\square$

## 2 Correctness of partition function computation

*Proof of Proposition 2.* Again, we will show the correctness by induction. Starting with the base case where  $u$  is a leaf of the cluster tree, the subtree  $T_u$  is the node  $u$  and the child set of  $u$  is empty. Eq 5 is then written as

$$m_{u \rightarrow v}(\bar{x}) = \sum_{\substack{\bar{x}' \in \mathcal{A}_{\text{diff}(u)} \\ \bar{x} \cup \bar{x}' \text{ is valid}}} \prod_{f \in \phi(u)} \exp(\alpha_f f(\bar{x} \cup \bar{x}'))$$

which shows the correctness for leaves.

For the induction step, let  $u$  be an internal node of the cluster tree; we assume that the message  $m_{c_i \rightarrow u}$  for all children  $c_i$ ,  $i \in \{1, \dots, k\}$  of  $u$  is correctly computed as in Proposition 2. Following the scheme as in the previous proof, we first rewrite the r.h.s of the claim applying the induction hypothesis,

r.h.s. (6) =

$$\sum_{\substack{\bar{x}' \in \mathcal{A}_{\text{diff}(u)} \\ \bar{x} \cup \bar{x}' \text{ is valid}}} \left[ \prod_{f \in \phi(u)} \exp(\alpha_f f(\bar{x} \cup \bar{x}')) \times \prod_{c_i \text{ child of } u} \sum_{\substack{\bar{y}_i \in \mathcal{A}_{\text{diff}(T_{c_i})} \\ \bar{x} \cup \bar{x}' \cup \bar{y}_i \text{ is valid}}} \prod_{f \in \phi(T_{c_i})} \exp(\alpha_f f(\bar{x} \cup \bar{x}' \cup \bar{y}_i)) \right]$$

As the set  $\text{diff}(T_u) \setminus \text{diff}(u)$  is disjointly decomposed into  $\text{diff}(T_{c_1}) \dots \text{diff}(T_{c_k})$ , the second term in the bracket can be seen as the Cartesian product of  $k$  sets. We can move the summations in front of the production,

$$= \sum_{\substack{\bar{x}' \in \mathcal{A}_{\text{diff}(u)} \\ \bar{x} \cup \bar{x}' \text{ is valid}}} \left[ \prod_{f \in \phi(u)} \exp(\alpha_f f(\bar{x} \cup \bar{x}')) \times \sum_{\substack{\bar{y}_1 \in \mathcal{A}_{\text{diff}(T_{c_1})} \\ \bar{x} \cup \bar{x}' \cup \bar{y}_1 \text{ is valid}}} \dots \sum_{\substack{\bar{y}_k \in \mathcal{A}_{\text{diff}(T_{c_k})} \\ \bar{x} \cup \bar{x}' \cup \bar{y}_k \text{ is valid}}} \prod_{c_i \text{ child of } u} \prod_{f \in \phi(T_{c_i})} \exp(\alpha_f f(\bar{x} \cup \bar{x}' \cup \bar{y}_i)) \right]$$

For every fixed assignment  $\bar{x} \cup \bar{x}'$ , the product over the functions of bag  $u$  is independent of the summations. Thus, we can move the summations over the assignments  $\bar{y}_i$  in front of the product,

$$= \sum_{\substack{\bar{x}' \in \mathcal{A}_{\text{diff}(u)} \\ \bar{x} \cup \bar{x}' \text{ is valid}}} \sum_{\substack{\bar{y}_1 \in \mathcal{A}_{\text{diff}(T_{c_1})} \\ \bar{x} \cup \bar{x}' \cup \bar{y}_1 \text{ is valid}}} \dots \sum_{\substack{\bar{y}_k \in \mathcal{A}_{\text{diff}(T_{c_k})} \\ \bar{x} \cup \bar{x}' \cup \bar{y}_k \text{ is valid}}} \left[ \prod_{f \in \phi(u)} \exp(\alpha_f f(\bar{x} \cup \bar{x}')) \times \prod_{c_i \text{ child of } u} \prod_{f \in \phi(T_{c_i})} \exp(\alpha_f f(\bar{x} \cup \bar{x}' \cup \bar{y}_i)) \right]$$

Then, we combine the summations over the single partial assignments  $\bar{y}_i$ ; moreover we replace the products with a single product ranging over the combined assignments  $\bar{y}$  of  $\text{diff}(T_u) \setminus \text{diff}(u)$  as  $\phi(T_u) \setminus \phi(u)$  is partitioned into  $\phi(T_{c_i})$ ,  $i = 1 \dots k$ .

$$= \sum_{\substack{\bar{x}' \in \mathcal{A}_{\text{diff}(u)} \\ \bar{x} \cup \bar{x}' \cup \bar{y} \text{ is valid}}} \sum_{\substack{\bar{y} \in \mathcal{A}_{\text{diff}(T_u) \setminus \text{diff}(u)} \\ \bar{x} \cup \bar{x}' \cup \bar{y} \text{ is valid}}} \left[ \prod_{f \in \phi(T_u)} \exp(\alpha_f f(\bar{x} \cup \bar{x}' \cup \bar{y})) \right]$$

The last term equals r.h.s. of Eq. (5), showing the induction step.  $\square$

## 3 Correctness of sampling by stochastic traceback

**Lemma S2.** At edge  $u \rightarrow v$ , Alg. 3 choses a partial assignment  $\bar{x} \in \mathcal{A}_{\text{diff}(u)}$  with probability

$$\mathbb{P}_{\text{alg}}(\bar{x} \mid x) = \frac{w_{u \rightarrow v}(\bar{x} \mid x)}{m_{u \rightarrow v}(x)}$$

where  $x$  is the partial assignment determined in the previous iterations and weight  $w_{u \rightarrow v}(\bar{x} \mid x)$  is defined as

$$w_{u \rightarrow v}(\bar{x} \mid x) = \prod_{f \in \phi(u)} \exp(\alpha_f f(x \cup \bar{x})) \prod_{c \text{ child of } u} m_{c \rightarrow u}(x \cup \bar{x}) = \sum_{\substack{\bar{y} \in \mathcal{A}_{\text{diff}(T_u) \setminus \text{diff}(u)} \\ x \cup \bar{x} \cup \bar{y} \text{ is valid}}} \prod_{f \in \phi(T_u)} \exp(\alpha_f f(x \cup \bar{x} \cup \bar{y})). \quad (\text{S1})$$

*Proof.* Let us order the partial assignments  $\bar{x}_i$  in  $\mathcal{A}_{\text{diff}(u)}$  with  $i$  from 1 to  $|\mathcal{A}_{\text{diff}(u)}|$ , each is associated with weight  $w_{u \rightarrow v}(\bar{x}_i \mid x) = \prod_{f \in \phi(u)} \exp(\alpha_f f(x \cup \bar{x}_i)) \prod_{c \text{ child of } u} m_{c \rightarrow u}(x \cup \bar{x}_i)$ . Note that the sum of all weights  $\sum_{i=1}^{|\mathcal{A}_{\text{diff}(u)}|} w_{u \rightarrow v}(\bar{x}_i \mid x)$  equals to  $m_{u \rightarrow v}(x)$ .

For a selected value  $t$ , Alg. 3 enumerates assignments  $\bar{x}_i$  starting from  $i = 1$ . In every iteration, it subtracts the weight  $w_{u \rightarrow v}(\bar{x}_i \mid x)$ . It is terminated as soon as  $t$  is negative, let this index be  $j$ , and assigns  $\bar{x}_j$  to  $\text{diff}(u)$ . In other words,  $\bar{x}_j$  is assigned to  $\text{diff}(u)$  if

$$\sum_{i=0}^j w_{u \rightarrow v}(\bar{x}_i \mid x) \leq t < \sum_{i=0}^{j+1} w_{u \rightarrow v}(\bar{x}_i \mid x)$$

with  $w_{u \rightarrow v}(\bar{x}_0 \mid x)$  is defined as 0 for  $i = 0$ . Since  $t$  is randomly and uniformly selected from 0 to  $m_{u \rightarrow v}(x)$ , the probability that Alg. 3 chooses  $\bar{x}$  is

$$\mathbb{P}_{\text{alg}}(\bar{x} \mid x) = \frac{w_{u \rightarrow v}(\bar{x} \mid x)}{m_{u \rightarrow v}(x)}.$$

Finally, the weight  $w_{u \rightarrow v}(\bar{x} \mid x) = \prod_{f \in \phi(u)} \exp(\alpha_f f(x \cup \bar{x})) \prod_{c \text{ child of } u} m_{c \rightarrow u}(x \cup \bar{x})$  can be seen as a special case of Eq. 6 by replacing the partial assignment set  $\mathcal{A}_{\text{diff}(u)}$  with a singleton  $\{\bar{x}\}$ . Applying Proposition 2 gives

$$w_{u \rightarrow v}(\bar{x} \mid x) = \sum_{\substack{\bar{y} \in \mathcal{A}_{\text{diff}(T_u) \setminus \text{diff}(u)} \\ x \cup \bar{x} \cup \bar{y} \text{ is valid}}} \prod_{f \in \phi(T_u)} \exp(\alpha_f f(x \cup \bar{x} \cup \bar{y})).$$

□

*Proof of Proposition 3.* Let us assume that the non-root nodes of the cluster tree are labeled in preorder as  $u_1, u_2, \dots, u_\ell$ . Alg. 3 assigns values in the order of  $\text{diff}(u_1), \dots, \text{diff}(u_\ell)$ ; it finally generates a total assignment since  $\cup_{i=1}^\ell \text{diff}(u_i) = \mathcal{X}$ .

Let  $x^* = \bar{x}_1^* \cup \dots \cup \bar{x}_\ell^*$  be a total assignment where  $\bar{x}_i^*$  is a partial assignment of  $\mathcal{A}_{\text{diff}(u_i)}$  for  $i$  from 1 to  $\ell$ . The probability of  $x^*$  can be written as product of conditional probabilities

$$\mathbb{P}(x^*) = \mathbb{P}(\bar{x}_1^*) \mathbb{P}(\bar{x}_2^* \mid \bar{x}_1^*) \dots \mathbb{P}(\bar{x}_\ell^* \mid \cup_{k=1}^{\ell-1} \bar{x}_k^*) = \cup_{i=1}^\ell \mathbb{P}(\bar{x}_i^* \mid \cup_{k=1}^{i-1} \bar{x}_k^*)$$

with the conditional Boltzmann probability

$$\mathbb{P}(\bar{x}_i^* \mid \cup_{k=1}^{i-1} \bar{x}_k^*) = \frac{\sum_{\substack{\bar{x} \in \mathcal{A}_{\text{diff}(u_{i+1}) \cup \dots \cup \text{diff}(u_\ell)} \\ \bar{x} \text{ is valid}}} \prod_{f \in \phi_{\text{all}}} \exp(\alpha_f f(\cup_{k=1}^{i-1} \bar{x}_k^* \cup \bar{x}_i^* \cup \bar{x}))}{\sum_{\substack{\bar{x}' \in \mathcal{A}_{\text{diff}(u_i)} \\ \bar{x}' \text{ is valid}}} \sum_{\substack{\bar{x} \in \mathcal{A}_{\text{diff}(u_{i+1}) \cup \dots \cup \text{diff}(u_\ell)} \\ \bar{x} \text{ is valid}}} \prod_{f \in \phi_{\text{all}}} \exp(\alpha_f f(\cup_{k=1}^{i-1} \bar{x}_k^* \cup \bar{x}' \cup \bar{x}))} \quad (\text{S2})$$

where  $\phi_{\text{all}}$  is the set of all network functions in the feature network. Note that for  $i = 1$ , the union  $\cup_{k=1}^0 \bar{x}_k^*$  is empty.

At the edge  $u_i \rightarrow v$ , where the variables  $\text{diff}(u_1), \dots, \text{diff}(u_{i-1})$  have been assigned by  $\bar{x}_1^*, \dots, \bar{x}_{i-1}^*$ , the probability that Alg. 3 chooses  $\bar{x}_i^*$  for  $\text{diff}(u_i)$  is given by Lemma S2 as

$$\mathbb{P}_{\text{alg}}(\bar{x}_i^* \mid \cup_{k=1}^{i-1} \bar{x}_k^*) = \frac{w_{u_i \rightarrow v}(\bar{x}_i^* \mid \cup_{k=1}^{i-1} \bar{x}_k^*)}{m_{u_i \rightarrow v}(\cup_{k=1}^{i-1} \bar{x}_k^*)}. \quad (\text{S3})$$

Our goal is to show that two conditional probabilities  $\mathbb{P}(\bar{x}_i^* \mid \cup_{k=1}^{i-1} \bar{x}_k^*)$  of Eq. S2 and  $\mathbb{P}_{\text{alg}}(\bar{x}_i^* \mid \cup_{k=1}^{i-1} \bar{x}_k^*)$  of Eq. S3 are actually the same.

We rewrite  $\mathbb{P}_{\text{alg}}$  of Eq. S3 using Eq. S1 and the definition of conditional partition function as in Eq. 5

$$\begin{aligned}
& \mathbb{P}_{\text{alg}}(\bar{x}_i^* \mid \cup_{k=1}^{i-1} \bar{x}_k^*) \\
&= \frac{\sum_{\substack{\bar{y} \in \mathcal{A}_{\text{diff}(T_{u_i}) \setminus \text{diff}(u_i)} \\ x \cup \bar{x}_i^* \cup \bar{y} \text{ is valid}}} \prod_{f \in \phi(T_{u_i})} \exp(\alpha_f f(\cup_{k=1}^{i-1} \bar{x}_k^* \cup \bar{x}_i^* \cup \bar{y}))}{\sum_{\substack{\bar{x}' \in \mathcal{A}_{\text{diff}(u_i)} \\ \bar{x}' \text{ is valid}}} \sum_{\substack{\bar{y} \in \mathcal{A}_{\text{diff}(T_{u_i}) \setminus \text{diff}(u_i)} \\ x \cup \bar{x}' \cup \bar{y} \text{ is valid}}} \prod_{f \in \phi(T_{u_i})} \exp(\alpha_f f(\cup_{k=1}^{i-1} \bar{x}_k^* \cup \bar{x}' \cup \bar{y}))}
\end{aligned}$$

Comparing with  $\mathbb{P}(\bar{x}_i^* \mid \cup_{k=1}^{i-1} \bar{x}_k^*)$  of Eq. S2, only a subset of network functions  $\phi(T_u)$  are taken into account. We are going to bring the rest into the expression. First, let us consider the functions assigned to the nodes that Alg. 3 has visited before edge  $u_i \rightarrow v$ , denoted by  $\phi_{\text{visited}} := \cup_{k=1}^{i-1} \phi(u_k)$ . Multiplying nominator and denominator by partial partition function  $\prod_{f \in \phi_{\text{visited}}} \exp(\alpha_f f(\cup_{k=1}^{i-1} \bar{x}_k^*))$  restricted to  $\phi_{\text{visited}}$  and the partial assignment  $\cup_{k=1}^{i-1} \bar{x}_k^*$  gives

$$\begin{aligned}
&= \frac{\left( \sum_{\substack{\bar{y} \in \mathcal{A}_{\text{diff}(T_{u_i}) \setminus \text{diff}(u_i)} \\ x \cup \bar{x}_i^* \cup \bar{y} \text{ is valid}}} \prod_{f \in \phi(T_{u_i})} \exp(\alpha_f f(\cup_{k=1}^{i-1} \bar{x}_k^* \cup \bar{x}_i^* \cup \bar{y})) \right) \left( \prod_{f \in \phi_{\text{visited}}} \exp(\alpha_f f(\cup_{k=1}^{i-1} \bar{x}_k^*)) \right)}{\left( \sum_{\substack{\bar{x}' \in \mathcal{A}_{\text{diff}(u_i)} \\ \bar{x}' \text{ is valid}}} \sum_{\substack{\bar{y} \in \mathcal{A}_{\text{diff}(T_{u_i}) \setminus \text{diff}(u_i)} \\ x \cup \bar{x}' \cup \bar{y} \text{ is valid}}} \prod_{f \in \phi(T_{u_i})} \exp(\alpha_f f(\cup_{k=1}^{i-1} \bar{x}_k^* \cup \bar{x}' \cup \bar{y})) \right) \left( \prod_{f \in \phi_{\text{visited}}} \exp(\alpha_f f(\cup_{k=1}^{i-1} \bar{x}_k^*)) \right)}
\end{aligned}$$

As  $\text{diff}(T_{u_i})$  is disjoint to the dependency of any function of  $\phi_{\text{visited}}$ , we can further group the products

$$\begin{aligned}
&= \frac{\sum_{\substack{\bar{y} \in \mathcal{A}_{\text{diff}(T_{u_i}) \setminus \text{diff}(u_i)} \\ x \cup \bar{x}_i^* \cup \bar{y} \text{ is valid}}} \prod_{f \in \phi_{\text{visited}} \cup \phi(T_{u_i})} \exp(\alpha_f f(\cup_{k=1}^{i-1} \bar{x}_k^* \cup \bar{x}_i^* \cup \bar{y}))}{\sum_{\substack{\bar{x}' \in \mathcal{A}_{\text{diff}(u_i)} \\ \bar{x}' \text{ is valid}}} \sum_{\substack{\bar{y} \in \mathcal{A}_{\text{diff}(T_{u_i}) \setminus \text{diff}(u_i)} \\ x \cup \bar{x}' \cup \bar{y} \text{ is valid}}} \prod_{f \in \phi_{\text{visited}} \cup \phi(T_{u_i})} \exp(\alpha_f f(\cup_{k=1}^{i-1} \bar{x}_k^* \cup \bar{x}' \cup \bar{y}))}
\end{aligned}$$

We consider now the rest of the network functions, denoted by  $\phi_{\text{rest}}$ . These functions are assigned to the cluster nodes, denoted by  $\mathcal{U}_{\text{rest}}$ , that have not been visited before the edge  $u_i \rightarrow v$  or are not in the subtree of  $u_i$ . Note that  $T_{u_i} \cup \mathcal{U}_{\text{rest}} = \{u_i, \dots, u_\ell\}$ . The partial partition function restricted to  $\phi_{\text{rest}}$  for fixed partial assignment  $\cup_{k=1}^{i-1} \bar{x}_k^*$  is

$$\sum_{\substack{\bar{y}' \in \mathcal{A}_{\cup_{u \in \mathcal{U}_{\text{rest}}} \text{diff}(u)} \\ \bar{y}' \text{ is valid}}} \prod_{f \in \phi_{\text{rest}}} \exp(\alpha_f f(\cup_{k=1}^{i-1} \bar{x}_k^* \cup \bar{y}')).$$

Multiplying again the partial partition function on nominator and denominator gives

$$\begin{aligned}
&= \frac{\left( \sum_{\substack{\bar{y} \in \mathcal{A}_{\text{diff}(T_{u_i}) \setminus \text{diff}(u_i)} \\ x \cup \bar{x}_i^* \cup \bar{y} \text{ is valid}}} \prod_{f \in \phi_{\text{visited}} \cup \phi(T_{u_i})} \exp(\alpha_f f(\cup_{k=1}^{i-1} \bar{x}_k^* \cup \bar{x}_i^* \cup \bar{y})) \right) \left( \sum_{\substack{\bar{y}' \in \mathcal{A}_{\cup_{u \in \mathcal{U}_{\text{rest}}} \text{diff}(u)} \\ \bar{y}' \text{ is valid}}} \prod_{f \in \phi_{\text{rest}}} \exp(\alpha_f f(\cup_{k=1}^{i-1} \bar{x}_k^* \cup \bar{y}')) \right)}{\left( \sum_{\substack{\bar{x}' \in \mathcal{A}_{\text{diff}(u_i)} \\ \bar{x}' \text{ is valid}}} \sum_{\substack{\bar{y} \in \mathcal{A}_{\text{diff}(T_{u_i}) \setminus \text{diff}(u_i)} \\ x \cup \bar{x}' \cup \bar{y} \text{ is valid}}} \prod_{f \in \phi_{\text{visited}} \cup \phi(T_{u_i})} \exp(\alpha_f f(\cup_{k=1}^{i-1} \bar{x}_k^* \cup \bar{x}' \cup \bar{y})) \right) \left( \sum_{\substack{\bar{y}' \in \mathcal{A}_{\cup_{u \in \mathcal{U}_{\text{rest}}} \text{diff}(u)} \\ \bar{y}' \text{ is valid}}} \prod_{f \in \phi_{\text{rest}}} \exp(\alpha_f f(\cup_{k=1}^{i-1} \bar{x}_k^* \cup \bar{y}')) \right)}
\end{aligned}$$

Because of the disjointness between  $\text{diff}(T_{u_i}) \setminus \text{diff}(u_i)$  and  $\cup_{u \in \mathcal{U}_{\text{rest}}} \text{diff}(u)$ , we can group the products and combine the partial assignments into one  $\bar{x} = \bar{y} \cup \bar{y}'$  as

$$\begin{aligned}
&= \frac{\sum_{\substack{\bar{x} \in \mathcal{A}_{\text{diff}(u_{i+1}) \cup \dots \cup \text{diff}(u_\ell)} \\ \bar{x} \text{ is valid}}} \prod_{f \in \phi_{\text{all}}} \exp(\alpha_f f(\cup_{k=1}^{i-1} \bar{x}_k^* \cup \bar{x}_i^* \cup \bar{x}))}{\sum_{\substack{\bar{x}' \in \mathcal{A}_{\text{diff}(u_i)} \\ \bar{x}' \text{ is valid}}} \sum_{\substack{\bar{x} \in \mathcal{A}_{\text{diff}(u_{i+1}) \cup \dots \cup \text{diff}(u_\ell)} \\ \bar{x} \text{ is valid}}} \prod_{f \in \phi_{\text{all}}} \exp(\alpha_f f(\cup_{k=1}^{i-1} \bar{x}_k^* \cup \bar{x}' \cup \bar{x}))}.
\end{aligned}$$

Thus,  $\mathbb{P}_{\text{alg}}(\bar{x}_i^* \mid \cup_{k=1}^{i-1} \bar{x}_k^*) = \mathbb{P}(\bar{x}_i^* \mid \cup_{k=1}^{i-1} \bar{x}_k^*)$ . □
